# Supplementary material for: Determining the Functionality of Local Health Boards in the Philippines: Perspectives from Local Government Units
Source: Research Square preprint supplement (doi:10.21203/rs.3.rs-7169520/v1), 2025-11-26
Supplement: Supplementary file 1 [file 4bdb5681c25c49348c6e5820.docx]

#

#

#

#

**Report on the Analysis of the FGD Questionnaire**

_______________________________________________


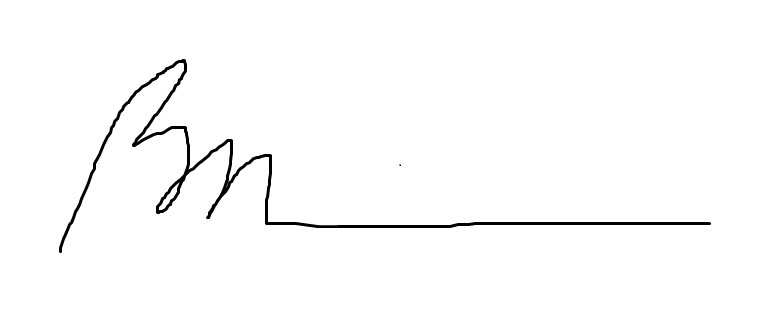


Prepared by:

**Bien Eli Nillos, MD, MHSS**

**Local Health Board Manual Consultant**

Approved by

**Anthony B. Cu, MD, MPM-HSD, MPH-EOH, CESE**

**Director IV**

**Bureau of Health Systems Development**

#

**Table of Contents**

[**Introduction 4**](#_heading=h.8u042q81mkm5)

[**Methodology for Questionnaire Validation 4**](#_heading=h.ntj54lytq9y8)

[Criteria 4](#_heading=h.w8a23kmj0h63)

[**Results 6**](#_heading=h.rmxx28cqo3lg)

[Question 1 6](#_heading=h.ebig7yn850ff)

[Question 2 6](#_heading=h.58kgh789d8qj)

[Question 3: 7](#_heading=h.ep9lnznja3v2)

[Question 4 7](#_heading=h.phkfqe149ync)

[Question 5: 7](#_heading=h.4fmd9syzn0k2)

[Question 6: 8](#_heading=h.po837fiuhr9k)

[Question 7: 8](#_heading=h.eolr0aj6vx8y)

[Question 8: 8](#_heading=h.ceci39eh40yi)

[Question 9: 9](#_heading=h.dep0o1mzeftv)

[Question 10 9](#_heading=h.365qodsx8jgc)

[Question 11: 9](#_heading=h.f5grvo5828t2)

[Question 12: 10](#_heading=h.ydkx8m1fzssx)

[Question 13: 10](#_heading=h.clqjq3shay19)

[Question 14: 10](#_heading=h.vdera55qz9ao)

[Question 15: 11](#_heading=h.ci42b4m61tm)

[Question 16: 11](#_heading=h.oc0wl12v1ig8)

[Question 17: 11](#_heading=h.3bcs6u67kdob)

[Question 18: 12](#_heading=h.e3j3g91v8tz)

[Question 19: 12](#_heading=h.i9lmqn567x84)

[Question 20: 12](#_heading=h.393j6touilwk)

[Question 21: 13](#_heading=h.ryozsnwre67)

[Question 22: 13](#_heading=h.svya6bz1ivsj)

[Question 23: 13](#_heading=h.d5xxtutr60yh)

[Question 24: 14](#_heading=h.de1flo897msj)

[Question 25: 14](#_heading=h.ofrtnzskodj3)

[Question 26: 14](#_heading=h.rrmj8jlek2o7)

[Question 27: 15](#_heading=h.6d274ee120qk)

[Question 28: 15](#_heading=h.7ezajga1fe0k)

[**FINAL LIST OF QUESTIONS FOR FGD 16**](#_heading=h.persnuamlik9)

[General Questions 16](#_heading=h.fw91fawcz0a2)

[Establishment of LHBs 16](#_heading=h.4fbpkp16o9qw)

[Functionality and Operations 16](#_heading=h.1vw333sazea2)

[Resource Mobilization 16](#_heading=h.tiwzy7ofnzli)

[Community Engagement and Participation 16](#_heading=h.fnyn0xw6ejkc)

[Monitoring and Evaluation 16](#_heading=h.ingl9oz87upr)

[Training and Capacity Building 17](#_heading=h.go0r5fneodwb)

[Policy and Regulatory Environment 17](#_heading=h.10fm33p50xee)

[Success Stories and Best Practices 17](#_heading=h.wxit4kzc82s)

[Challenges and Recommendations 17](#_heading=h.72w7su71o4yb)

[Proposed additional questions or Follow up questions: 17](#_heading=h.pdm9yqsinlgn)

[**Summary of proceedings and insights from the pre-test conducted 17**](#_heading=h.v6ro7626tsw3)

[**Participants 19**](#_heading=h.j5v9j3oxik92)

[**Recommendations: 19**](#_heading=h.pwog32211kce)

#

# Introduction

This report presents the results of the validation process for a set of questions designed for a Focus Group Discussion (FGD) on Local Health Boards (LHBs). The purpose of the FGD is to gather in-depth insights into the roles, responsibilities, and operational dynamics of LHBs, with a particular focus on governance processes such as their establishment, challenges, decision-making processes, community engagement, resource mobilization, and evaluation practices. The validation process involved a thorough review and refinement of the questions to ensure they are clear, relevant, and capable of eliciting comprehensive and meaningful responses from participants. This report outlines the methodology used for validation, the feedback received from experts, and the final set of validated questions, providing a solid foundation for the upcoming FGD aimed at enhancing the effectiveness and impact of Local Health Boards in delivering health services.

# Methodology for Questionnaire Validation

The validation of the questionnaire involved a multi-step process to ensure the quality and effectiveness of the questions designed for the Focus Group Discussion (FGD) on Local Health Boards (LHBs). Initially, the questions were evaluated by a panel of experts based on four key criteria: clarity, relevance, comprehensiveness, and engagement. Each criterion was given equal weight, contributing 25% to the overall score of each question.

## Criteria

1. **Clarity**
   - **Definition:** The question is clearly worded and easy to understand.
   - **Scale:**
     - **1 (Poor):** The question is confusing, vague, or ambiguous.
     - **2 (Fair):** The question is somewhat clear but may require additional explanation.
     - **3 (Good):** The question is mostly clear but could be refined for better clarity.
     - **4 (Excellent):** The question is very clear and easily understood by participants.
2. **Relevance**
   - **Definition:** The question is directly related to the objectives of the FGD.
   - **Scale:**
     - **1 (Poor):** The question is not relevant to the FGD objectives.
     - **2 (Fair):** The question has limited relevance and may not contribute significantly to the discussion.
     - **3 (Good):** The question is generally relevant but could be more focused on the FGD objectives.
     - **4 (Excellent):** The question is highly relevant and directly addresses the FGD objectives.
3. **Comprehensiveness**
   - **Definition:** The question covers the intended topic thoroughly and prompts detailed responses.
   - **Scale:**
     - **1 (Poor):** The question is too narrow or superficial.
     - **2 (Fair):** The question is somewhat comprehensive but may miss important aspects.
     - **3 (Good):** The question is comprehensive but could be expanded to cover more aspects.
     - **4 (Excellent):** The question is very comprehensive and encourages in-depth discussion.
4. **Engagement**
   - **Definition:** The question stimulates interest and encourages participation among FGD participants.
   - **Scale:**
     - **1 (Poor):** The question is unengaging and unlikely to prompt discussion.
     - **2 (Fair):** The question is somewhat engaging but may not sustain interest.
     - **3 (Good):** The question is engaging but could be more stimulating.
     - **4 (Excellent):** The question is highly engaging and likely to prompt active discussion.

Experts rated each question on these criteria, and the scores were then calculated to determine the overall quality of each question. This analysis helped identify questions that were well-constructed and those that required refinement.

Following the expert evaluation, the questions were pretested with a preselected group of LHB members from other sites. This pretesting phase was crucial for gathering practical feedback on how the questions functioned in a real-world context, ensuring they were effective in eliciting detailed and meaningful responses.

The combined insights from expert ratings and pretesting were used to refine the questions further, resulting in a validated set of questions ready for deployment in the upcoming FGD. This thorough validation process aimed to enhance the reliability and validity of the data collected, contributing to a more comprehensive understanding of LHBs' operations and challenges.

# Results

The objective of Question No. 1 is to elicit detailed insights into the individual roles and responsibilities of members within the Local Health Board. By understanding these roles and responsibilities, the discussion aims to identify how each member contributes to the board's overall functioning, decision-making processes, and the implementation of health initiatives. This will help to uncover any overlapping duties, gaps in responsibilities, and opportunities for improving collaboration and efficiency within the board.

| Question 1 | “Can you describe your role and responsibilities within the Local Health Board?” | | | |
| --- | --- | --- | --- | --- |
| Clarity | Relevance | Comprehensiveness | Engagement | Quality of Question |
| 3.9 | 4.0 | 3.9 | 4..0 | 3.9 |
| Action taken | Retained with no alterations | | | |
| Final Question no. 1 | “Can you describe your role and responsibilities within the Local Health Board?” | | | |

The objective of Question No. 2 is to gather information on the tenure of Local Health Board members and to gain an understanding of the changes and developments that have occurred over time. By exploring the duration of each member's involvement and their observations, the discussion aims to highlight trends, improvements, challenges, and shifts in priorities or practices within the board. This information will provide valuable context for evaluating the board's evolution and effectiveness, as well as identifying areas for future growth and improvement.

| Question 2 | “How long have you been a member of the Local Health Board, and what changes have you observed over time?” | | | |
| --- | --- | --- | --- | --- |
| Clarity | Relevance | Comprehensiveness | Engagement | Quality of Question |
| 3.7 | 3.9 | 3.9 | 3.9 | 3.8 |
| Action taken | Question to be retained with minimal edit. | | | |
| FInal Q2 | “How long have you been a member of the Local Health Board, and what **specific** changes **(management and performance)** have you observed over time?” | | | |

The objective of Question No. 3 is to understand the foundational processes involved in establishing or reviving the Local Health Board in the locality. By exploring the initial steps taken, the discussion aims to identify key actions, stakeholders, challenges, and strategies that were critical in setting up the board. This information will provide valuable insights into best practices, potential pitfalls, and the necessary groundwork required for successfully establishing or reviving a Local Health Board, which can inform future efforts in other localities.

| Question 3: | What were the initial steps taken to establish the Local Health Board in your locality? | | | |
| --- | --- | --- | --- | --- |
| Clarity | Relevance | Comprehensiveness | Engagement | Quality of Question |
| 3.9 | 3.7 | 3.4 | 3.9 | 3.7 |
| Action taken | **Question will be optional. It will be removed**. | | | |

The objective of Question No. 4 is to identify and understand the specific challenges faced during the establishment or revival of the Local Health Board (LHB) and the strategies employed to address these challenges. By discussing these difficulties and solutions, the discussion aims to uncover common obstacles, effective problem-solving approaches, and lessons learned. This information will be valuable for providing guidance to other communities looking to establish or revive their own Local Health Boards, ensuring they are better prepared to navigate similar challenges.

| Question 4 | | What challenges did you encounter during the establishment phase, and how were they addressed? | | | | | | | |
| --- | --- | --- | --- | --- | --- | --- | --- | --- | --- |
| Clarity | | Relevance | | Comprehensiveness | | Engagement | | Quality of Question | |
| 4.0 | | 4.0 | | 4.0 | | 4.0 | | 4.0 | |
| Action taken | | Question retained with no alteration. can be addressed to TWG involved in setting up LHB (reviving)  What challenges did you encounter **during the establishment phase or revitalization of the LHB**, and how were they addressed? | | | | | | | |

The objective of Question No. 5 is to identify and understand the specific strategies or approaches that were particularly effective in the successful establishment or revitalization of the Local Health Board (LHB). By exploring these effective methods, the discussion aims to highlight notable practices, innovative tactics, and key factors that contributed to the smooth and efficient setup of the LHB. This information will be instrumental in providing a roadmap for other communities seeking to establish their own Local Health Boards, ensuring they can replicate successful strategies and avoid common pitfalls.

| Question 5: | Were there any specific strategies or approaches that were particularly effective in setting up the LHB? | | | | |
| --- | --- | --- | --- | --- | --- |
| Clarity | | Relevance | Comprehensiveness | Engagement | Quality of Question |
| 3.9 | | 4.0 | 3.9 | 4.0 | 3.9 |
| Action taken | | Question to be retained. | | | |

The objective of Question No. 6 is to understand the frequency and structure of meetings held by the Local Health Board. By exploring how often the board meets and the typical agenda items discussed, the discussion aims to gain insights into the operational rhythm, priorities, and key issues addressed by the board. This information will help assess the board's efficiency, effectiveness, and areas of focus, providing a clearer picture of its functioning and governance practices.

| Question 6: | How often does your Local Health Board meet, and what are the typical agenda items? | | | | |
| --- | --- | --- | --- | --- | --- |
| Clarity | | Relevance | Comprehensiveness | Engagement | Quality of Question |
| 4.0 | | 4.0 | 3.9 | 4.0 | 4.0 |
| Action taken | | Question will remain but can be clarified during the asking of the question. | | | |
|  | | “How often does your Local Health Board meet, and what are the typical agenda items? | | | |

The objective of Question No. 7 is to gain a comprehensive understanding of the decision-making process within the Local Health Board (LHB). By exploring how decisions are made and implemented, the discussion aims to uncover the board's governance structure, the roles of various members, the methods used to reach consensus, and the mechanisms for executing decisions. This information will provide valuable insights into the effectiveness, transparency, and inclusivity of the decision-making process, highlighting strengths and potential areas for improvement within the board.

| Question 7: | Can you discuss the decision-making process within your LHB? How are decisions made and implemented? | | | | |
| --- | --- | --- | --- | --- | --- |
| Clarity | | Relevance | Comprehensiveness | Engagement | Quality of Question |
| 3.9 | | 4.0 | 4.0 | 4.0 | 4.0 |
| Action taken | | remove the words “and implemented” | | | |
|  | | **Can you discuss the decision-making process within your LHB? How are decisions made?** | | | |

The objective of Question No. 8 is to identify and understand the key functions and activities of the Local Health Board (LHB) and how they contribute to the delivery of local health services. By exploring these roles and activities, the discussion aims to highlight the board's core responsibilities, initiatives, and programs, as well as their impact on improving health outcomes in the community. This information will provide a detailed overview of the LHB's contributions to local health service delivery, showcasing effective practices and identifying areas for enhancement.

| Question 8: | What are the key functions and activities of your LHB, and how do they contribute to local health service delivery? | | | | | |
| --- | --- | --- | --- | --- | --- | --- |
| Clarity | | Relevance | Comprehensiveness | Engagement | Quality of Question | |
| 4.0 | | 4.0 | 4.0 | 4.0 | 4.0 | |
| Action taken | | replace the phrase “to local health service delivery” to “strengthen community participation” | | | | |
|  | | “What are the key functions and activities of your LHB, and how do they contribute to local health service delivery or **strengthen community participation**? | | | | |

The objective of Question No. 9 is to understand the mechanisms and strategies used by the Local Health Board to secure funding and resources for its proposed plans and programs. By exploring how the board obtains financial support and other necessary resources, the discussion aims to uncover various funding sources, approaches to resource mobilization, and any challenges faced in the process. This information will provide valuable insights into the sustainability and financial management of the LHB.

| Question 9: | How does your LHB secure funding and resources for its activities? | | | | |
| --- | --- | --- | --- | --- | --- |
| Clarity | | Relevance | Comprehensiveness | Engagement | Quality of Question |
| 3.3 | | 4.0 | 3.9 | 4.0 | 3.8 |
| Action taken | | question **can be removed** | | | |

The objective of Question No. 10 is to identify and understand the successful strategies for resource mobilization employed by the Local Health Board. By sharing these effective approaches, the discussion aims to highlight best practices, innovative methods, and key factors that have enabled the board to secure necessary resources for its activities. This information will be valuable for providing guidance and inspiration to other LHBs and their Management Support Unit seeking to enhance their resource mobilization efforts, ensuring they can effectively support their initiatives and objectives.

| Question 10 | Can you share any successful strategies for resource mobilization that your LHB has employed? | | | | |
| --- | --- | --- | --- | --- | --- |
| Clarity | | Relevance | Comprehensiveness | Engagement | Quality of Question |
| 4.0 | | 4.0 | 4.0 | 4.0 | 4.0 |
| Action taken | | Question to be retained. | | | |

The objective of Question No. 11 is to uncover the specific challenges faced by the Local Health Board in identifying resources and to explore the strategies and solutions employed to overcome these challenges. By discussing these obstacles and their resolutions, the discussion aims to identify common barriers such as funding constraints, competition for resources, bureaucratic hurdles, or community support issues. This information will provide valuable insights into effective problem-solving approaches and lessons learned, offering guidance to other LHBs facing similar resource mobilization challenges.

| Question 11: | What challenges have you faced in securing resources, and how have you overcome them? | | | | |
| --- | --- | --- | --- | --- | --- |
| Clarity | | Relevance | Comprehensiveness | Engagement | Quality of Question |
| 4.0 | | 4.0 | 3.9 | 4.0 | 4.0 |
| Action taken | | Question to be retained. | | | |

The objective of Question No. 12 is to understand the methods and strategies used by the Local Health Board (LHB) to engage with the community and other stakeholders. By exploring these engagement practices, the discussion aims to uncover how the board communicates, collaborates, and involves local residents, organizations, and partners in its activities and decision-making processes. This information will provide insights into the effectiveness of the LHB's outreach efforts, its ability to build partnerships, gather community input, and foster collaboration for improving local health outcomes.

| Question 12: | How does your LHB engage with the community and other stakeholders? | | | | |
| --- | --- | --- | --- | --- | --- |
| Clarity | | Relevance | Comprehensiveness | Engagement | Quality of Question |
| 3.3 | | 3.5 | 3.4 | 3.8 | 3.5 |
| Action taken | | Remove question or reframe question | | | |

The objective of Question No. 13 is to identify and understand the methods used by the Local Health Board (LHB) to gather community input and feedback on health programs and services. By exploring these engagement strategies, the discussion aims to uncover the mechanisms and channels through which the board solicits opinions, concerns, and suggestions from local residents regarding health initiatives. This information will provide insights into the LHB's commitment to community involvement, its responsiveness to community needs, and its ability to tailor health programs to better serve the local population.

| Question 13: | What methods do you use to gather community input and feedback on health programs and services? | | | | |
| --- | --- | --- | --- | --- | --- |
| Clarity | | Relevance | Comprehensiveness | Engagement | Quality of Question |
| 4.0 | | 4.0 | 3.7 | 4.0 | 3.9 |
| Action taken | | Question to be retained. | | | |

The objective of Question No. 14 is to highlight specific examples where community involvement has directly influenced decisions and actions taken by the Local Health Board (LHB). By exploring these instances, the discussion aims to illustrate the impact of community input on shaping policies, programs, and initiatives within the LHB. This information will provide insights into the board's responsiveness to community needs, its commitment to participatory decision-making, and its ability to incorporate diverse perspectives into its operational strategies for enhancing local health outcomes.

| Question 14: | Can you provide examples of how community involvement has influenced LHB decisions and actions? | | | | |
| --- | --- | --- | --- | --- | --- |
| Clarity | | Relevance | Comprehensiveness | Engagement | Quality of Question |
| 4.0 | | 4.0 | 4.0 | 4.0 | 4.0 |
| Action taken | | Question to be retained. | | | |

The objective of Question No. 15 is to understand the methods and processes used by the Local Health Board to monitor and evaluate the effectiveness of its programs and initiatives. By exploring these evaluation practices, the discussion aims to uncover how the board assesses the impact and outcomes of its health programs and initiatives. This information will provide insights into the LHB's commitment to evidence-based practices, its ability to measure program effectiveness which will help identify areas for improvement,and ensure accountability to stakeholders and the community.

| Question 15: | How does your LHB monitor and evaluate the effectiveness of its programs and initiatives? | | | | |
| --- | --- | --- | --- | --- | --- |
| Clarity | | Relevance | Comprehensiveness | Engagement | Quality of Question |
| 3.9 | | 4.0 | 4.0 | 4.0 | 4.0 |
| Action taken | | Can separate the question*  **“How does your LHB monitor progress of programs and initiatives?**  **HOw does your LHB evaluate effectiveness?”** | | | |

The objective of Question No. 16 is to identify and understand the specific tools and indicators used by the Local Health Board for monitoring and evaluating its programs and initiatives. By exploring these monitoring and evaluation methods, the discussion aims to uncover the metrics, data collection tools, and performance indicators utilized by the board to assess the impact, outcomes, and effectiveness of its health interventions. This information will provide insights into the LHB's systematic approach to program evaluation, its ability to measure progress towards goals, and its capacity to make data-driven decisions for improving local health service delivery.

| Question 16: | What tools or indicators do you use for monitoring and evaluation? | | | | |
| --- | --- | --- | --- | --- | --- |
| Clarity | | Relevance | Comprehensiveness | Engagement | Quality of Question |
| 4.0 | | 4.0 | 4.0 | 4.0 | 4.0 |
| Action taken | | Question to be retained. | | | |

The objective of Question No. 17 is to uncover and share lessons learned and best practices in the field of monitoring and evaluation from the perspective of the Local Health Board (LHB). By exploring these insights, the discussion aims to highlight effective strategies, methodologies, and approaches that have proven successful in assessing the impact and effectiveness of health programs and initiatives. This information will provide valuable guidance and knowledge to other LHBs and similar organizations seeking to enhance their monitoring and evaluation practices, ensuring they can improve accountability, measure outcomes, and optimize resource allocation for better health service delivery.

| Question 17: | Can you share any lessons learned or best practices in the area of monitoring and evaluation? | | | | |
| --- | --- | --- | --- | --- | --- |
| Clarity | | Relevance | Comprehensiveness | Engagement | Quality of Question |
| 3.8 | | 4.0 | 3.9 | 3.9 | 3.9 |
| Action taken | | **can be asked to emphasize separately lessons learned AND notable successful practices instead of “best practices”** | | | |

The objective of Question No. 18 is to understand the training and capacity-building activities provided to members of the Local Health Board (LHB). By exploring these initiatives, the discussion aims to uncover the specific skills, knowledge, and competencies that have been targeted for enhancement among board members. This information will provide insights into the board's commitment to professional development, its efforts to strengthen governance and leadership within the LHB, and its ability to support members in effectively fulfilling their roles and responsibilities in improving local health outcomes.

| Question 18: | What training or capacity-building activities have been provided to LHB members? | | | | |
| --- | --- | --- | --- | --- | --- |
| Clarity | | Relevance | Comprehensiveness | Engagement | Quality of Question |
| 4.0 | | 4.0 | 4.0 | 4.0 | 4.0 |
| Action taken | | Added point of reference for time. “What training or capacity-building activities have been provided to LHB members **within the past 5 years?”** | | | |

The objective of Question No. 19 is to understand the impact of various activities on the functionality and effectiveness of the Local Health Board (LHB). By exploring the outcomes of these activities, the discussion aims to identify specific improvements, changes, or enhancements in the board’s operations, decision-making processes, and overall performance. This information will provide insights into how targeted initiatives have contributed to the LHB's success and will highlight areas where these activities have made significant differences in achieving the board's health service delivery goals.

| Question 19: | How have these activities impacted the functionality and effectiveness of your LHB? | | | | |
| --- | --- | --- | --- | --- | --- |
| Clarity | | Relevance | Comprehensiveness | Engagement | Quality of Question |
| 3.7 | | 4.0 | 3.7 | 4.0 | 3.9 |
| Action taken | | How have these **capacity-building** activities impacted the functionality and effectiveness of your LHB? | | | |

The objective of Question No. 20 is to identify the additional training or support that would benefit the Local Health Board (LHB). By exploring the perceived needs and gaps in current training and support, the discussion aims to uncover specific areas where further capacity-building efforts are required. This information will provide valuable insights into how to enhance the skills and knowledge of LHB members, ensuring they are better equipped to fulfill their roles and improve health service delivery within the community.

| Question 20: | What additional training or support do you think would benefit your LHB? | | | | |
| --- | --- | --- | --- | --- | --- |
| Clarity | | Relevance | Comprehensiveness | Engagement | Quality of Question |
| 4.0 | | 4.0 | 4.0 | 4.0 | 4.0 |
| Action taken | | Question to be retained. | | | |

The objective of Question No. 21 is to understand the influence of national policies and regulations on the operations of the Local Health Board (LHB). By exploring how these broader governmental directives affect the board's activities, decision-making, and implementation of health programs in the local level, the discussion aims to identify both supportive and challenging aspects of these policies. This information will provide insights into the alignment between national and local health priorities, the flexibility of the LHB to adapt to regulatory changes, and areas where advocacy might be needed to improve policy impact on local health service delivery.

| Question 21: | How do national policies and regulations impact the operations of your LHB? | | | | |
| --- | --- | --- | --- | --- | --- |
| Clarity | | Relevance | Comprehensiveness | Engagement | Quality of Question |
| 3.9 | | 4.0 | 4.0 | 4.0 | 4.0 |
| Action taken | | Question to be retained. | | | |

The objective of Question No. 22 is to identify the specific policy changes or updates that have significantly affected the activities of the Local Health Board (LHB). the discussion aims to highlight how recent legislative or regulatory adjustments have impacted the board’s operations, priorities, and health service delivery. This information will provide insights into the board’s adaptability to policy shifts, the challenges and opportunities these changes have created, and their overall effect on the effectiveness and efficiency of the LHB’s activities.

| Question 22: | Are there any specific policy changes or updates that have significantly affected your LHB’s activities? | | | | |
| --- | --- | --- | --- | --- | --- |
| Clarity | | Relevance | Comprehensiveness | Engagement | Quality of Question |
| 3.9 | | 4.0 | 3.7 | 4.0 | 3.9 |
| Action taken | | Can be rephrased to: **What are local or national** policy changes or updates that **you are aware of** which have significantly affected your LHB’s activities? | | | |

The objective of Question No. 23 is to gather recommendations for improving the policy and regulatory environment to better support Local Health Boards (LHBs). By exploring these suggestions, the discussion aims to identify specific changes or enhancements that could facilitate more effective operations, decision-making, and health service delivery by LHBs. This information will provide valuable insights into the needs and challenges faced by LHBs, offering a basis for advocating for policy reforms that enhance their ability to fulfill their roles and improve community health outcomes.

| Question 23: | What recommendations do you have for improving the policy and regulatory environment to support LHBs? | | | | |
| --- | --- | --- | --- | --- | --- |
| Clarity | | Relevance | Comprehensiveness | Engagement | Quality of Question |
| 3.9 | | 4.0 | 4.0 | 4.0 | 4.0 |
| Action taken | | Question to be retained. | | | |

The objective of Question No. 24 is to highlight success stories or notable achievements of the Local Health Board (LHB). By sharing these examples, the discussion aims to showcase effective practices, innovative initiatives, and impactful outcomes that have been realized through the board's efforts. This information will provide inspiration and practical insights for other LHBs and stakeholders, demonstrating the positive impact of well-executed health programs and the potential for replicating successful strategies in different contexts.

| Question 24: | Can you share any success stories or notable achievements of your LHB? | | | | |
| --- | --- | --- | --- | --- | --- |
| Clarity | | Relevance | Comprehensiveness | Engagement | Quality of Question |
| 4.0 | | 4.0 | 4.0 | 4.0 | 4.0 |
| Action taken | | Question to be retained. | | | |

The objective of Question No. 25 is to identify and share best practices that have been effective for the Local Health Board (LHB) and could be beneficial for other LHBs. By exploring these successful practices, the discussion aims to highlight strategies, approaches, and methodologies that have proven to enhance the board’s operations, decision-making processes, and health service delivery. This information will provide valuable guidance and actionable insights for other LHBs seeking to improve their own practices, fostering a culture of learning and continuous improvement across different boards.

| Question 25: | What best practices have you identified that could be beneficial for other LHBs? | | | | |
| --- | --- | --- | --- | --- | --- |
| Clarity | | Relevance | Comprehensiveness | Engagement | Quality of Question |
| 4.0 | | 4..0 | 4.0 | 4.0 | 4.0 |
| Action taken | | What **notable successful** practices have you identified that could be beneficial for other LHBs? | | | |

The objective of Question No. 26 is to identify and understand the most significant challenges currently faced by the Local Health Board (LHB). By exploring these challenges, the discussion aims to uncover key obstacles, barriers, or issues that impact the board's ability to effectively deliver health services and fulfill its mission. This information will provide insights into priority areas for improvement, resource allocation, and strategic planning within the LHB, guiding efforts to address critical challenges and enhance overall operational efficiency and effectiveness.

| Question 26: | What are the most significant challenges your LHB currently faces? | | | | |
| --- | --- | --- | --- | --- | --- |
| Clarity | | Relevance | Comprehensiveness | Engagement | Quality of Question |
| 4.0 | | 4.0 | 4.0 | 4.0 | 4.0 |
| Action taken | | Question to be retained. | | | |

The objective of Question No. 27 is to gather recommendations for strategies and solutions to address the significant challenges faced by the Local Health Board (LHB). By exploring these suggestions, the discussion aims to identify practical approaches, innovative solutions, and actionable steps that can be implemented to overcome obstacles and improve the board's effectiveness in delivering health services. This information will provide insights into potential pathways for addressing specific challenges, enhancing organizational resilience, and optimizing the LHB's capacity to meet community health needs efficiently.

| Question 27: | What strategies or solutions would you recommend to address these challenges? | | | | |
| --- | --- | --- | --- | --- | --- |
| Clarity | | Relevance | Comprehensiveness | Engagement | Quality of Question |
| 4.0 | | 4.0 | 4.0 | 4.0 | 4.0 |
| Action taken | | Question to be retained. | | | |

The objective of Question No. 28 is to identify the specific technical assistance needed from external organizations such as the Department of Health (DOH) or the Department of the Interior and Local Government (DILG) to support the Local Health Board (LHB). By exploring these needs, the discussion aims to pinpoint areas where expertise, guidance, or resources from national government agencies can enhance the LHB's operations, governance, and service delivery. This information will provide insights into priority areas for collaboration and support, fostering partnerships that strengthen the LHB's capacity to effectively address local health challenges and improve community outcomes.

| Question 28: | What technical assistance from external organizations (DOH or DILG) does your LHB most need and why? | | | | |
| --- | --- | --- | --- | --- | --- |
| Clarity | | Relevance | Comprehensiveness | Engagement | Quality of Question |
| 3.9 | | 4.0 | 4.0 | 4.0 | 4.0 |
| Action taken | | Question to be retained. | | | |

# FINAL LIST OF QUESTIONS FOR FGD

## General Questions

1. “Can you describe your role and responsibilities within the Local Health Board?”
2. “How long have you been a member of the Local Health Board, and what **specific** changes (management and performance) have you observed over time?”
3. What challenges did you encounter **during the establishment phase or revitalization of the LHB**, and how were they addressed?

## Establishment of LHBs

1. Were there any specific strategies or approaches that were particularly effective in setting up the LHB?
2. “How often does your Local Health Board meet, and what are the usual agenda items?

## Functionality and Operations

1. Were there any specific strategies or approaches that were particularly effective in setting up the LHB?
2. “What are the key functions and activities of your LHB, and how do they contribute to local health service delivery or **strengthen community participation**?

## Resource Mobilization

1. Can you share any successful strategies for resource mobilization that your LHB has employed?
2. What challenges have you faced in securing resources, and how have you overcome them?

## Community Engagement and Participation

1. How does your LHB engage with the community and other stakeholders?
2. What methods do you use to gather community input and feedback on health programs and services?
3. Can you provide examples of how community involvement has influenced LHB decisions and actions?

## Monitoring and Evaluation

1. **How does your LHB monitor and evaluate the effectiveness of its programs and initiatives?**
2. What tools or indicators do you use for monitoring and evaluation?
3. Can you share any lessons learned or best practices in the area of monitoring and evaluation?

##

## Training and Capacity Building

1. What training or capacity-building activities have been provided to LHB members **within the past 5 years?**
2. How have these **capacity-building** activities impacted the functionality and effectiveness of your LHB??
3. What additional training or support do you think would benefit your LHB?

## Policy and Regulatory Environment

1. How do national policies and regulations impact the operations of your LHB?
2. **What are local or national** policy changes or updates that **you are aware of** which have significantly affected your LHB’s activities?
3. What recommendations do you have for improving the policy and regulatory environment to support LHBs?

## Success Stories and Best Practices

1. Can you share any success stories or notable achievements of your LHB?
2. What **notable successful** practices have you identified that could be beneficial for other LHBs?

## Challenges and Recommendations

1. What are the most significant challenges your LHB currently faces?
2. What strategies or solutions would you recommend to address these challenges?
3. What technical assistance from external organizations (DOH or DILG) does your LHB most need and why?

## Proposed additional questions or Follow up questions:

1. How do you see the role of an LHB? How does your LHB fulfill this role/s?
2. How can LHBs sustain their functionality over time?
3. Can you describe the process of **how you were selected to become part of the LHB?**
4. How do you ensure accountability among Local Health Board (LHB) members in fulfilling their roles and responsibilities, and what mechanisms are in place to monitor and evaluate their performance?
5. **How do you select the members of your LHB especially if it's expanded?**
6. **What do you think is the impact of the LHB on the effectiveness of health programs being implemented in your areas?**

# Summary of proceedings and insights from the pre-test conducted

Introduction and Meeting Purpose

Dr. Bien Nillos, consultant for the DOH, introduced the purpose of this pre-test focus group discussion (FGD) to validate the questions and questionnaires that will be used for upcoming FGDs in four provinces. The goal is to ensure the questions are capturing the right information before launching the full FGD sessions in August and September.

Participant Introductions and Roles

Participants introduced themselves and described their roles and responsibilities within their local health boards. This included members such as medical officers, health officers, and administrative staff who support the operations of the local health boards.

Establishment and Evolution of Local Health Boards

Participants shared the initial steps taken to establish or revive their local health boards, including advocating to local chief executives, identifying the required members, and overcoming challenges like availability of members and political dynamics. They also discussed how the local health boards have evolved over time, such as expanding membership and increasing the frequency and substance of meetings.

Strategies for Effective Local Health Boards

Participants described effective strategies for setting up and maintaining functional local health boards, such as engaging with the local chief executive, involving the Department of the Interior and Local Government (DILG), and ensuring the finance management team is represented. They also discussed the typical meeting frequency and agenda items covered.

Securing Funding and Resources

Participants shared their experiences and strategies for securing funding and resources for their local health board activities, including leveraging the local government budget and advocating for dedicated funding allocations.

Community Engagement and Feedback

Participants discussed how their local health boards gather community input and feedback on health programs and services, such as through barangay health planning sessions. They provided examples of how community involvement has influenced local health board decisions and actions.

Monitoring and Evaluation of Programs

Participants shared their perspectives on the role of local health boards in monitoring and evaluating the effectiveness of health programs and initiatives. They discussed the tools and indicators used, as well as the evolving nature of the local health board's function in this area.

Capacity Building Needs

Participants highlighted the capacity building activities they have received to support their work on the local health board, such as training on bridging leadership (MLGP and PLGP) and health systems planning. They also identified additional skills and knowledge that would help make their local health boards more functional.

During the pretest of the questions for the Focus Group Discussion (FGD), participants were fully engaged, demonstrating a high level of involvement and enthusiasm. They openly shared their opinions and experiences related to each question or issue presented. The candid discussions and active participation from all members provided rich, detailed insights, highlighting the participants' commitment to contributing valuable feedback. This open dialogue was instrumental in refining the questions and ensuring they effectively capture the diverse perspectives and experiences of Local Health Board (LHB) members. Verbal consent was taken prior to the start, especially the agreement to have the conversation digitally recorded.

The total run of the FGD was 2 hours.

# Participants

| **Names** | **Position** | **LGU** |
| --- | --- | --- |
| Castroverde, Mary Joy | DMO V | Capiz |
| Tormon, Marimi | Other technical staff | Capiz |
| Espiritu, Joeffry | DMO IV | Capiz (Dao, Maayon, Sigma, Roxas City) |
| Recio, Verlie | Other technical staff | PhilHealth - Capiz |
| Nera, Donna Sarah | DMO/DOH REP | Capiz |
| Rivera, Winefred | PHO/CHO/MHO | Cuartero, Capiz |
| Gallardo, Flor D' Lyn | DMO/DOH REP | Nueva Valencia, Guimaras |
| Lariosa, Ma. Fe | Other technical staff | Salvador Benedicto, Negros Occidental |
| Morin, Jade Paul | PHO/CHO/MHO | Salvador Benedicto, Negros Occidental |
| De la Fuente, Nelson | PHO/CHO/MHO | Valladolid, Negros Occidental |

# Recommendations:

Provide the list of questions to participants prior to the Focus Group Discussion (FGD) and allocate 10-15 minutes for them to review and jot down their responses to specific questions. This preparation will facilitate quicker and more efficient sharing of answers during the actual FGD. An optimal group should be small yet diverse, including 2 Municipal/City/Provincial Health Officers, 2 Health Committee Members from the Sangguniang Bayan/Panlalawigan, 2 Local Chief Executives, 2 NGO representatives, 2 Development Management Officers, and 2 technical staff or expanded members. This composition will encourage more engagement and ensure efficient time management. During the FGD, each participant will have a copy of the questions for reference, and the questions will also be displayed on a screen to enhance visual engagement.
